# Supplementary material
Source: publisher site journal article supplement (https://www.dovepress.com/article/414151)
Supplement: Supplementary file 1 [file get_supplementary_file.php]

**Supplementary Table 1. Recommendations to consider for evolution of the device and instructions for use**

|  | **Functionality** | **Recommendation to consider** |
| --- | --- | --- |
| Device | PIN digits | Enlarge the pin digits and the delete/back button. |
| Titration and dose reduction | Have the titration and dose reduction features in the injection settings instead of clinical setup. |
| Injection sites | Have all the injection site options disabled when choosing the desired ones, to prevent users forgetting to turn the other ones off. |
| Battery percentage | Include the numerical battery percentage next to the battery level icon. |
| Texture | Add ridges, grooves, or a dotted texture to the surface of the device. |
| History | Add capability to scroll back in the calendar view to view injection history and the ability to view the injection sites and depth. |
| Reminders | Add ability for the device to connect to the user’s mobile phone. Include a distinguishable sound or alarm on the device as a reminder. |
| Wrist strap | Consider adding a wrist strap, with a toggle that users could then pull to tighten the strap on their wrist. |
| Instructions for use | Dose reduction | Make it easier to find the dose reduction section. |
| Injection sites | Include in the IFU that all other sites should be turned off apart from the desired ones the user has chosen. |
| Contents | Include an arrow indicating there is another page of the contents at the bottom of the page. |

**Supplementary Table 2. Performance summary for use scenarios and knowledge tasks**

|  | **Use errors # types (# instances)** | **Assists # types (# instances)** | **Close calls # types (# instances)** | **Difficulties # types (# instances)** |
| --- | --- | --- | --- | --- |
| **Use scenario 1: Enable titration mode (healthcare professionals only)** | | | | |
| Enable titration mode | 1 (2) | 0 | 0 | 0 |
| Confirm settings | 0 | 0 | 0 | 0 |
| **Use scenarios 2 & 4: Administer injection** | | | | |
| Enable reduced dose | 1 (1) | 0 | 0 | 0 |
| Gather auxiliary materials (alcohol wipe, bandage, sharps container) | 1 (19) | 0 | 0 | 0 |
| Retrieve cartridge from refrigerator | 0 | 0 | 0 | 0 |
| Inspect new cartridge | 1 (39) | 0 | 1 (2) | 0 |
| Open autoinjector cartridge door | 0 | 1 (2) | 0 | 1 (4) |
| Dispose of old cartridge | 1 (10) | 0 | 1 (4) | 0 |
| Load next cartridge (new) | 0 | 0 | 1 (6) | 0 |
| Wash hands | 1 (34) | 0 | 0 | 0 |
| Disinfect injection site | 1 (30) | 0 | 0 | 0 |
| Retrieve new needle | 1 (1) | 0 | 1 (1) | 0 |
| Load new needle | 0 | 0 | 0 | 2 (3) |
| Remove needle cap | 1 (1) | 0 | 0 | 1 (1) |
| Choose injection site | 2 (2) | 0 | 0 | 1 (2) |
| Position autoinjector on injection site | 0 | 0 | 0 | 1 (3) |
| Press injection button to start injection | 0 | 0 | 0 | 1 (1) |
| Hold autoinjector against injection site | 1 (8) | 0 | 0 | 0 |
| Reinsert needle cap (to remove needle) | 0 | 0 | 1 (1) | 0 |
| Remove needle cap with used needle | 0 | 0 | 0 | 0 |
| Dispose of needle | 1 (3) | 0 | 1 (5) | 0 |
| Complete an interrupted injection | 0 | 0 | 0 | 0 |
| **Use scenario 3: Change injection settings** | | | | |
| Change hold time | 0 | 0 | 0 | 1 (1) |
| Change injection depth | 0 | 0 | 0 | 0 |
| **Use scenario 5: View history** | | | | |
| Check injection history | 1 (21) | 0 | 2 (2) | 0 |
| Check last injection time | 0 | 1 (1) | 0 | 1 (1) |
| Checking injection sites | 0 | 1 (1) | 0 | 0 |

| **Knowledge task 1: Knowledge check and instructions for use reading comprehension** | | | | |
| --- | --- | --- | --- | --- |
| Check if cartridge is damaged after a fall on the ground | 2 (31) | 0 | 0 | 0 |
| Inspect cartridge (if applicable) | 2 (46) | 0 | 0 | 0 |
| Retrieving needle | 2 (31) | 0 | 0 | 0 |
| Wash hands | 1 (8) | 0 | 0 | 0 |
| Choose injection site | 2 (22) | 0 | 0 | 0 |
| Position autoinjector on injection site | 0 | 0 | 0 | 0 |
| Press injection button to start injection | 0 | 0 | 0 | 0 |
| Wipe down autoinjector with slightly damp cloth | 2 (20) | 0 | 0 | 0 |
| **Knowledge task 2: Screen reading comprehension** | | | | |
| Inspect new cartridge | 0 | 0 | 0 | 0 |
| Cancel injection (optional) | 1 (2) | 0 | 1 (1) | 0 |
| Cartridge status is unknown | 2 (15) | 0 | 0 | 1 (1) |
| Needle expired due to inactivity | 1 (3) | 0 | 0 | 2 (2) |
| Needle cap removed unexpectedly | 2 (6) | 0 | 0 | 2 (3) |
| Needle detachment failure | 6 (14) | 0 | 0 | 1 (1) |
| Needle attached at power on | 6 (13) | 1 (3) | 1 (1) | 3 (6) |
| Cartridge will soon be rejected due to inactivity | 4 (4) | 0 | 0 | 1 (2) |
| Last injection less than 48 hours ago | 1 (1) | 0 | 0 | 0 |
| Select site | 2 (10) | 0 | 0 | 1 (1) |
| Titration schedule | 4 (10) | 1 (10) | 0 | 0 |
| Dispose of old cartridge | 0 | 0 | 0 | 0 |

**Abbreviation**: #, number of
